# Supplementary material for: The transcriptional elongation rate regulates alternative polyadenylation in yeast
Source: eLife journal article supplement (doi:10.7554/elife.59810), 2020-08-26
Supplement: supp [file elife-59810-supp-v1.zip]

Archive with 7 entries (7 files):
- elife_poa_e59810_Transparent_Reporting_File.docx
- elife_poa_e59810_Figure_1_figure_supplement_1.pdf
- elife_poa_e59810_Figure_2_figure_supplement_1.pdf
- elife_poa_e59810_Figure_3_figure_supplement_1.pdf
- elife_poa_e59810_Figure_4_figure_supplement_1.pdf
- elife_poa_e59810_Figure_5_figure_supplement_1.pdf
- elife_poa_e59810_Figure_6_figure_supplement_1.pdf
