# Supplementary material for: The transcriptional elongation rate regulates alternative polyadenylation in yeast
Source: eLife journal article supplement (doi:10.7554/elife.59810), 2020-08-26
Supplement: supp [file elife-59810-supp-v1.zip › elife_poa_e59810_Figure_1_figure_supplement_1.pdf]

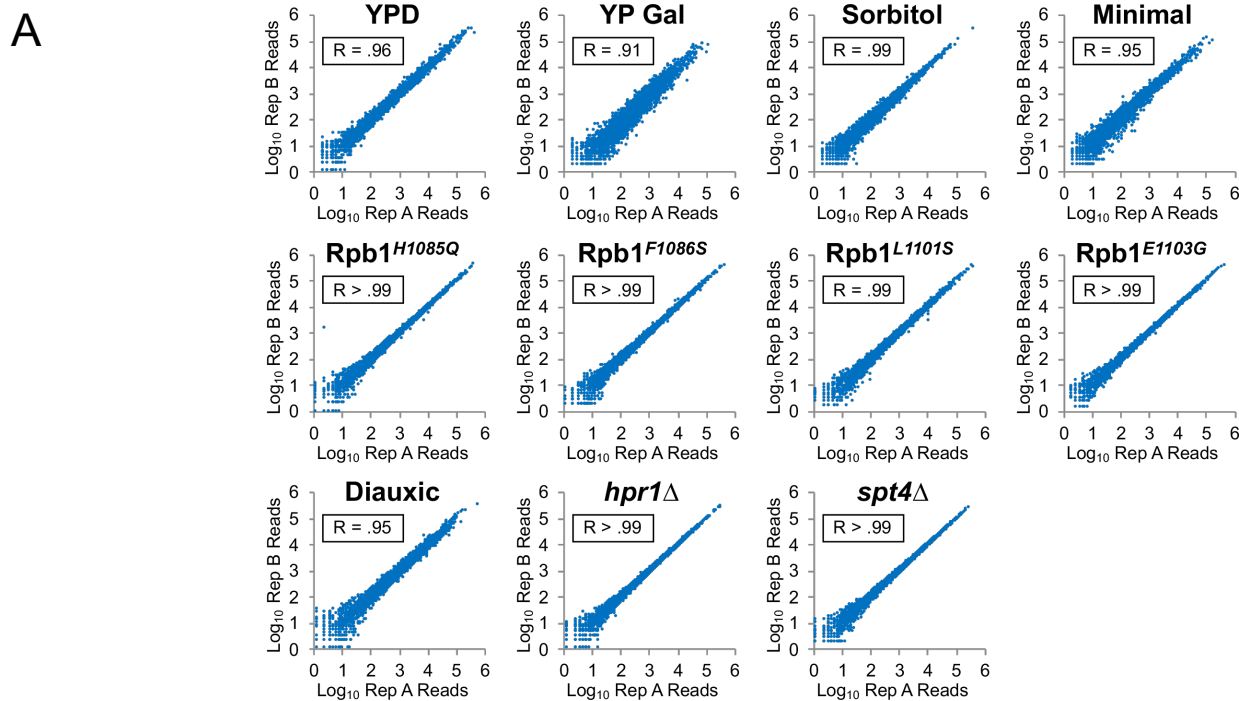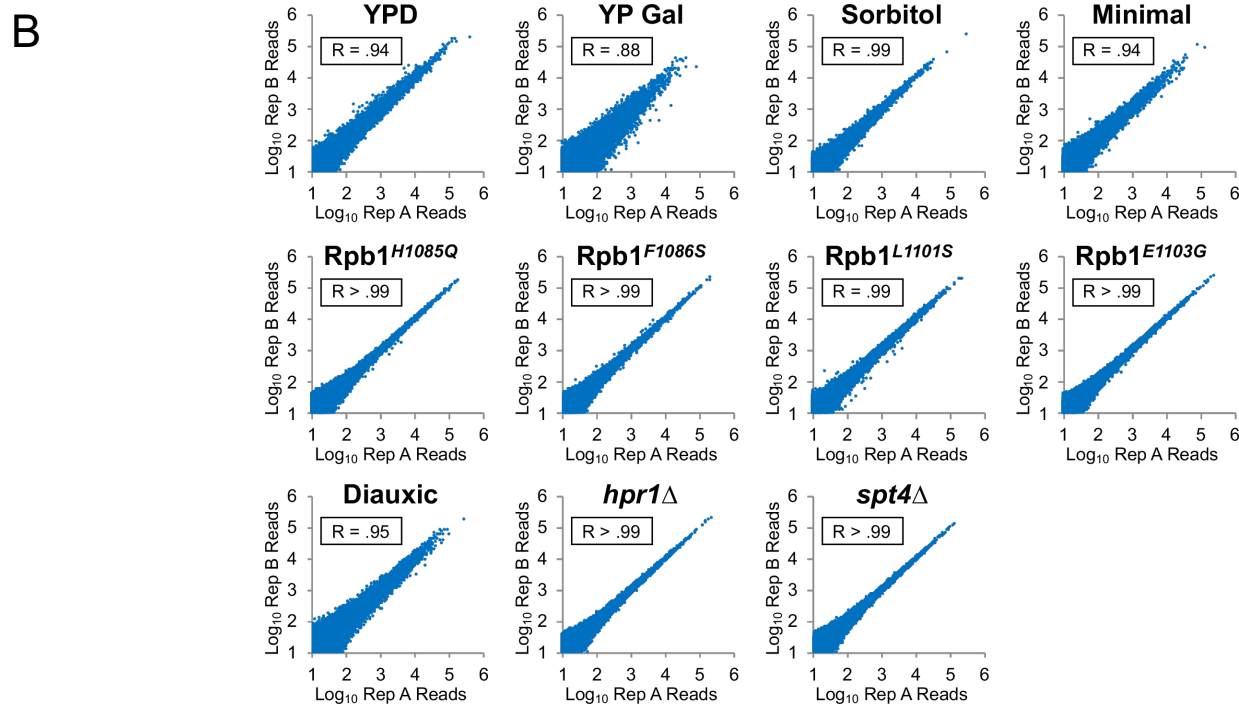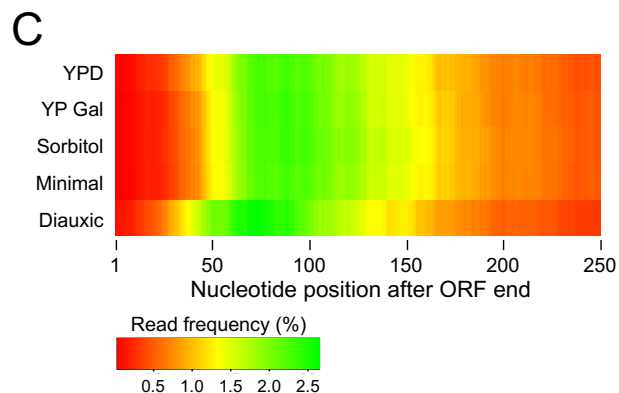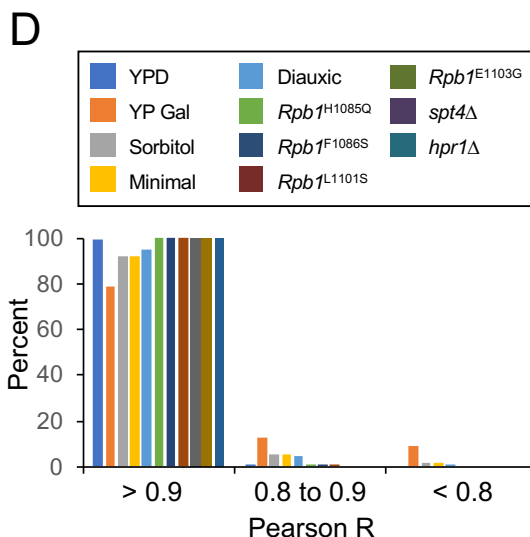

| Condition                     | Median Pearson R |
|-------------------------------|------------------|
| YPD                           | 0.99             |
| YP Gal                        | 0.97             |
| Sorbitol                      | 0.99             |
| Minimal                       | 0.99             |
| Diauxic                       | 0.99             |
| <i>Rpb1</i> <sup>H1085Q</sup> | > 0.99           |
| <i>Rpb1</i> <sup>F1086S</sup> | > 0.99           |
| <i>Rpb1</i> <sup>L1101S</sup> | > 0.99           |
| <i>Rpb1</i> <sup>E1103G</sup> | > 0.99           |
| <i>spt4</i> Δ                 | > 0.99           |
| <i>hpr1</i> Δ                 | > 0.99           |

Figure 1–figure supplement 1
