# Supplementary figures and images for: The transcriptional elongation rate regulates alternative polyadenylation in yeast
Source: eLife journal article supplement (doi:10.7554/elife.59810), 2020-08-26

A

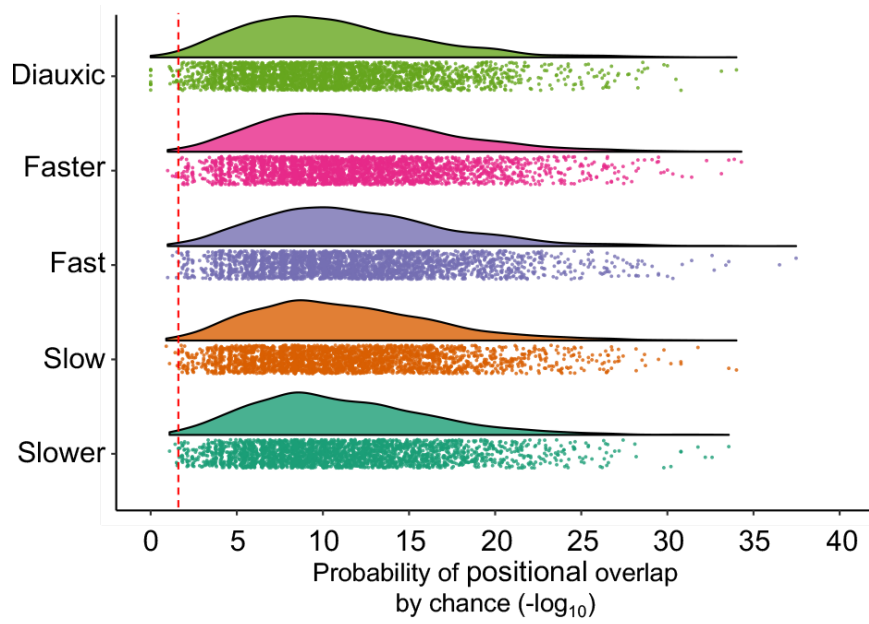

B

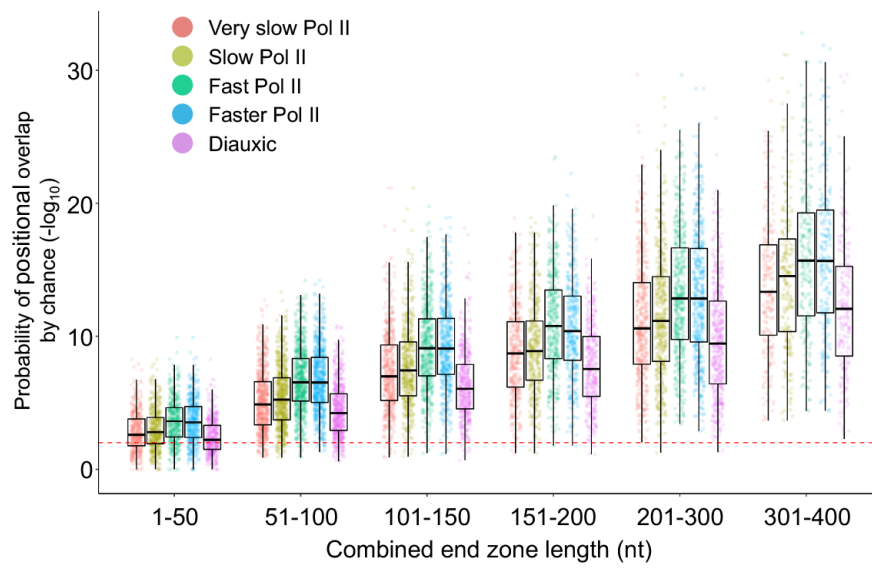

Figure 3—figure supplement 1

Supplement: supp [file elife-59810-supp-v1.zip]

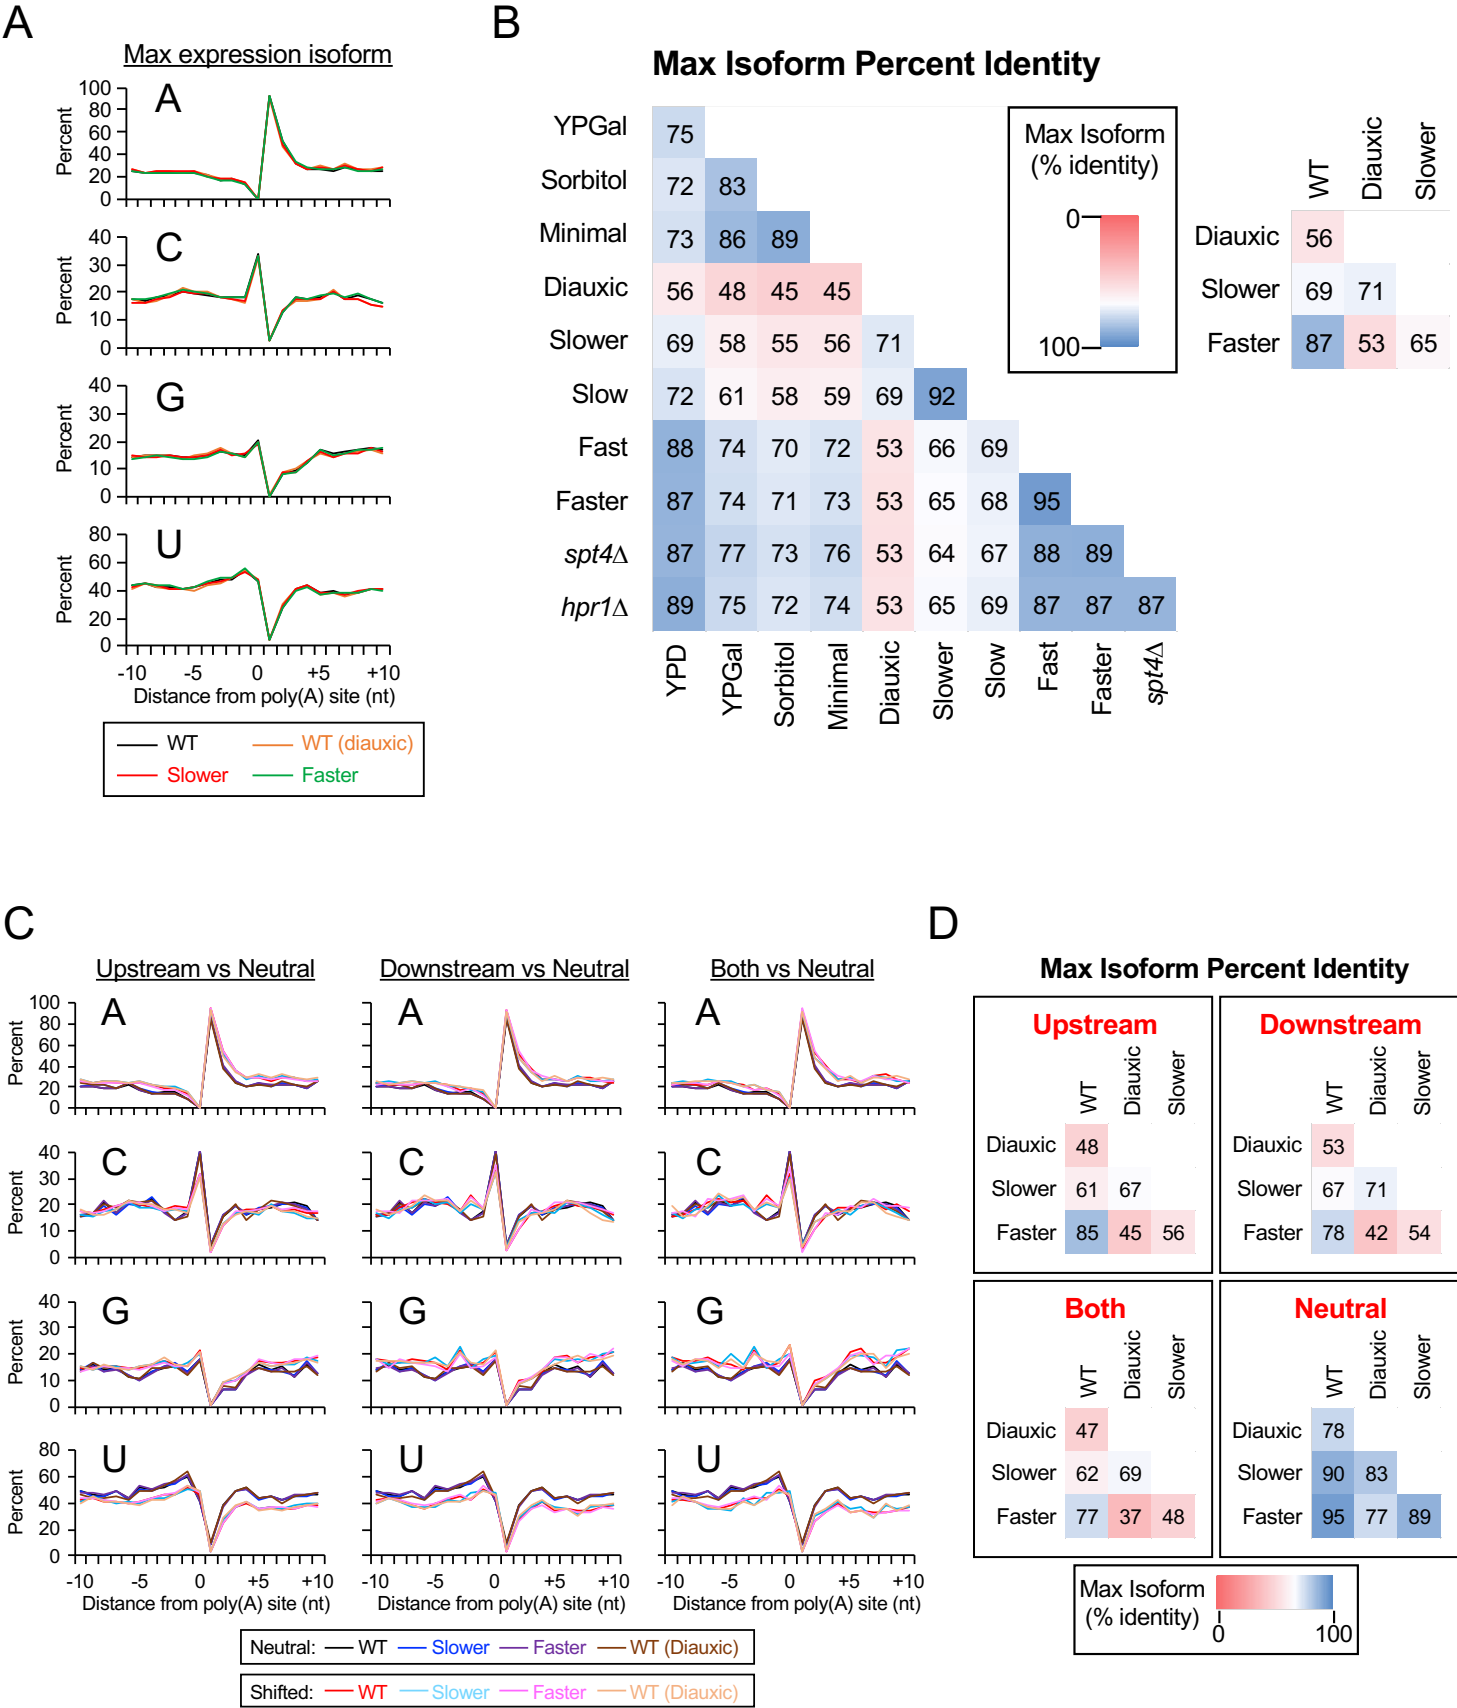

Figure 5—figure supplement 1

Supplement: supp [file elife-59810-supp-v1.zip]

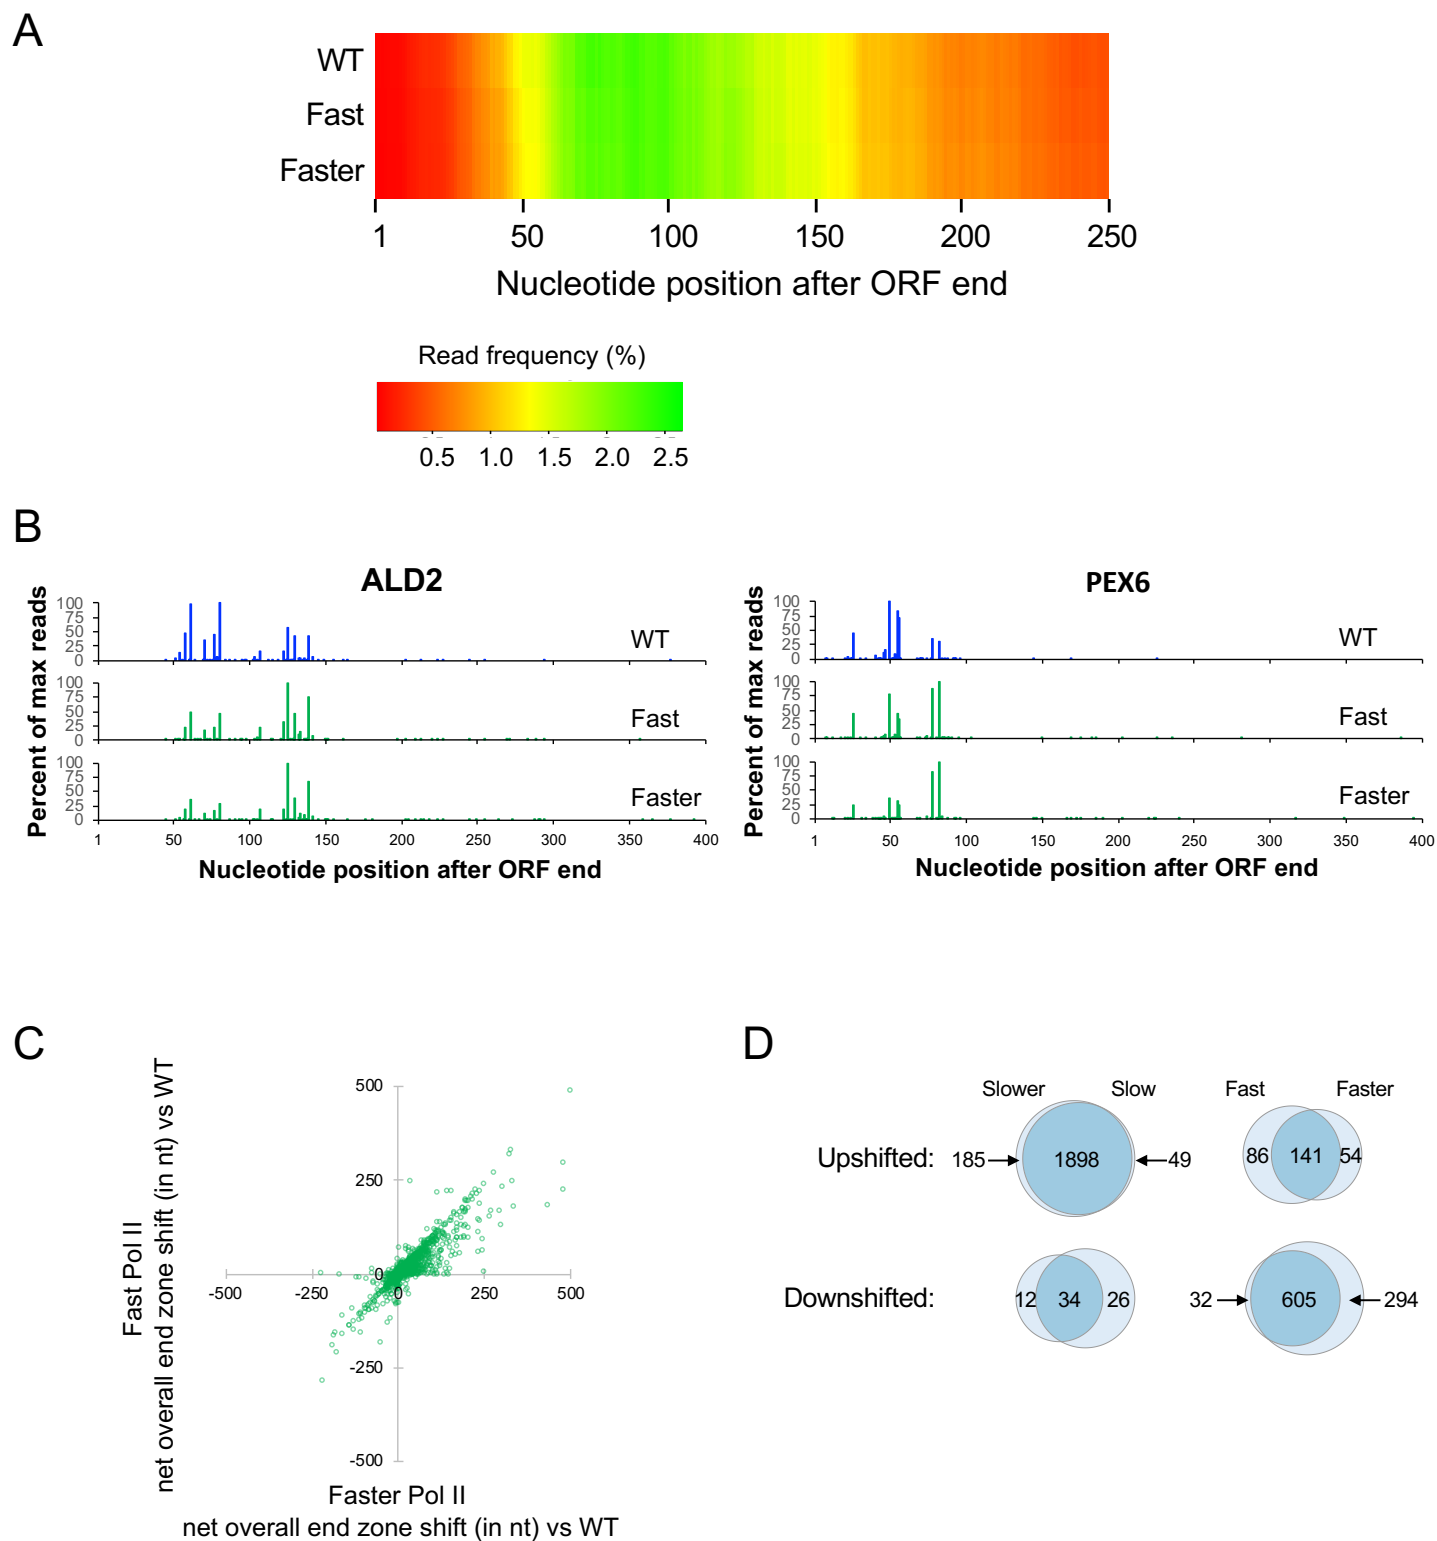

Figure 4—figure supplement 1

Supplement: supp [file elife-59810-supp-v1.zip]

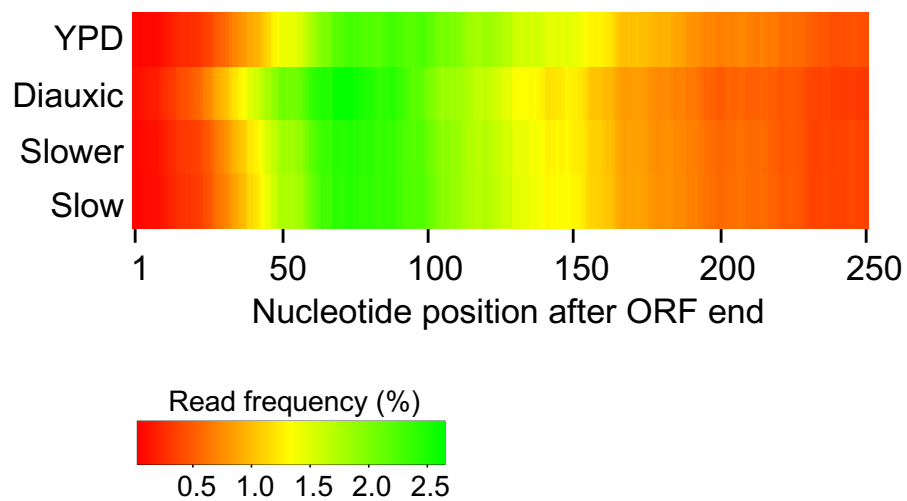

Figure 2—figure supplement 1

Supplement: supp [file elife-59810-supp-v1.zip › elife_poa_e59810_Figure_2_figure_supplement_1.pdf]

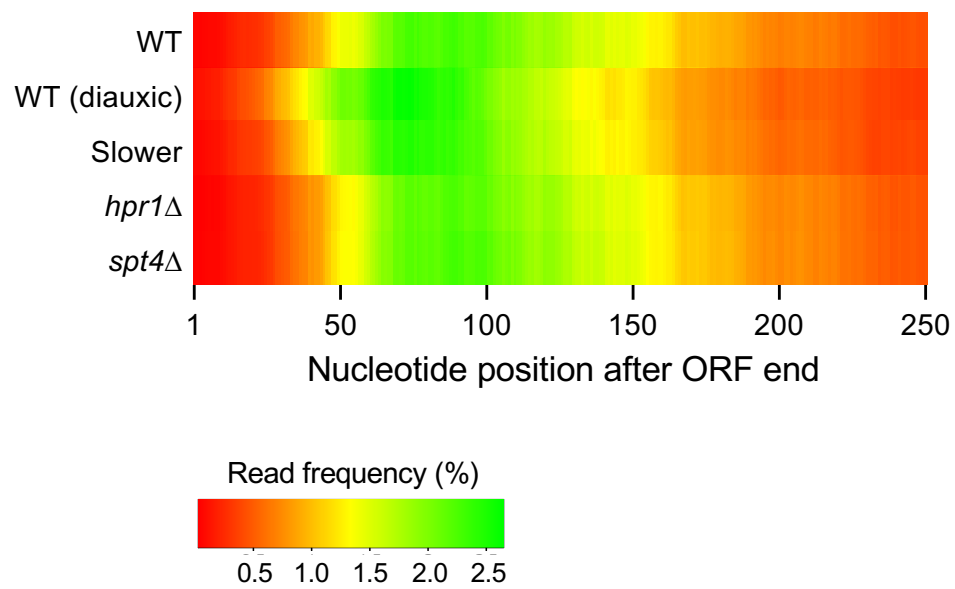

Figure 6—figure supplement 1

Supplement: supp [file elife-59810-supp-v1.zip › elife_poa_e59810_Figure_6_figure_supplement_1.pdf]
